# Supplementary material for: Single-cell RNA sequencing reveals a landscape and targeted treatment of ferroptosis in retinal ischemia/reperfusion injury
Source: Springer Nature journal article supplement (doi:10.1186/s12974-022-02621-9), 2022-10-26

**Figure S1**

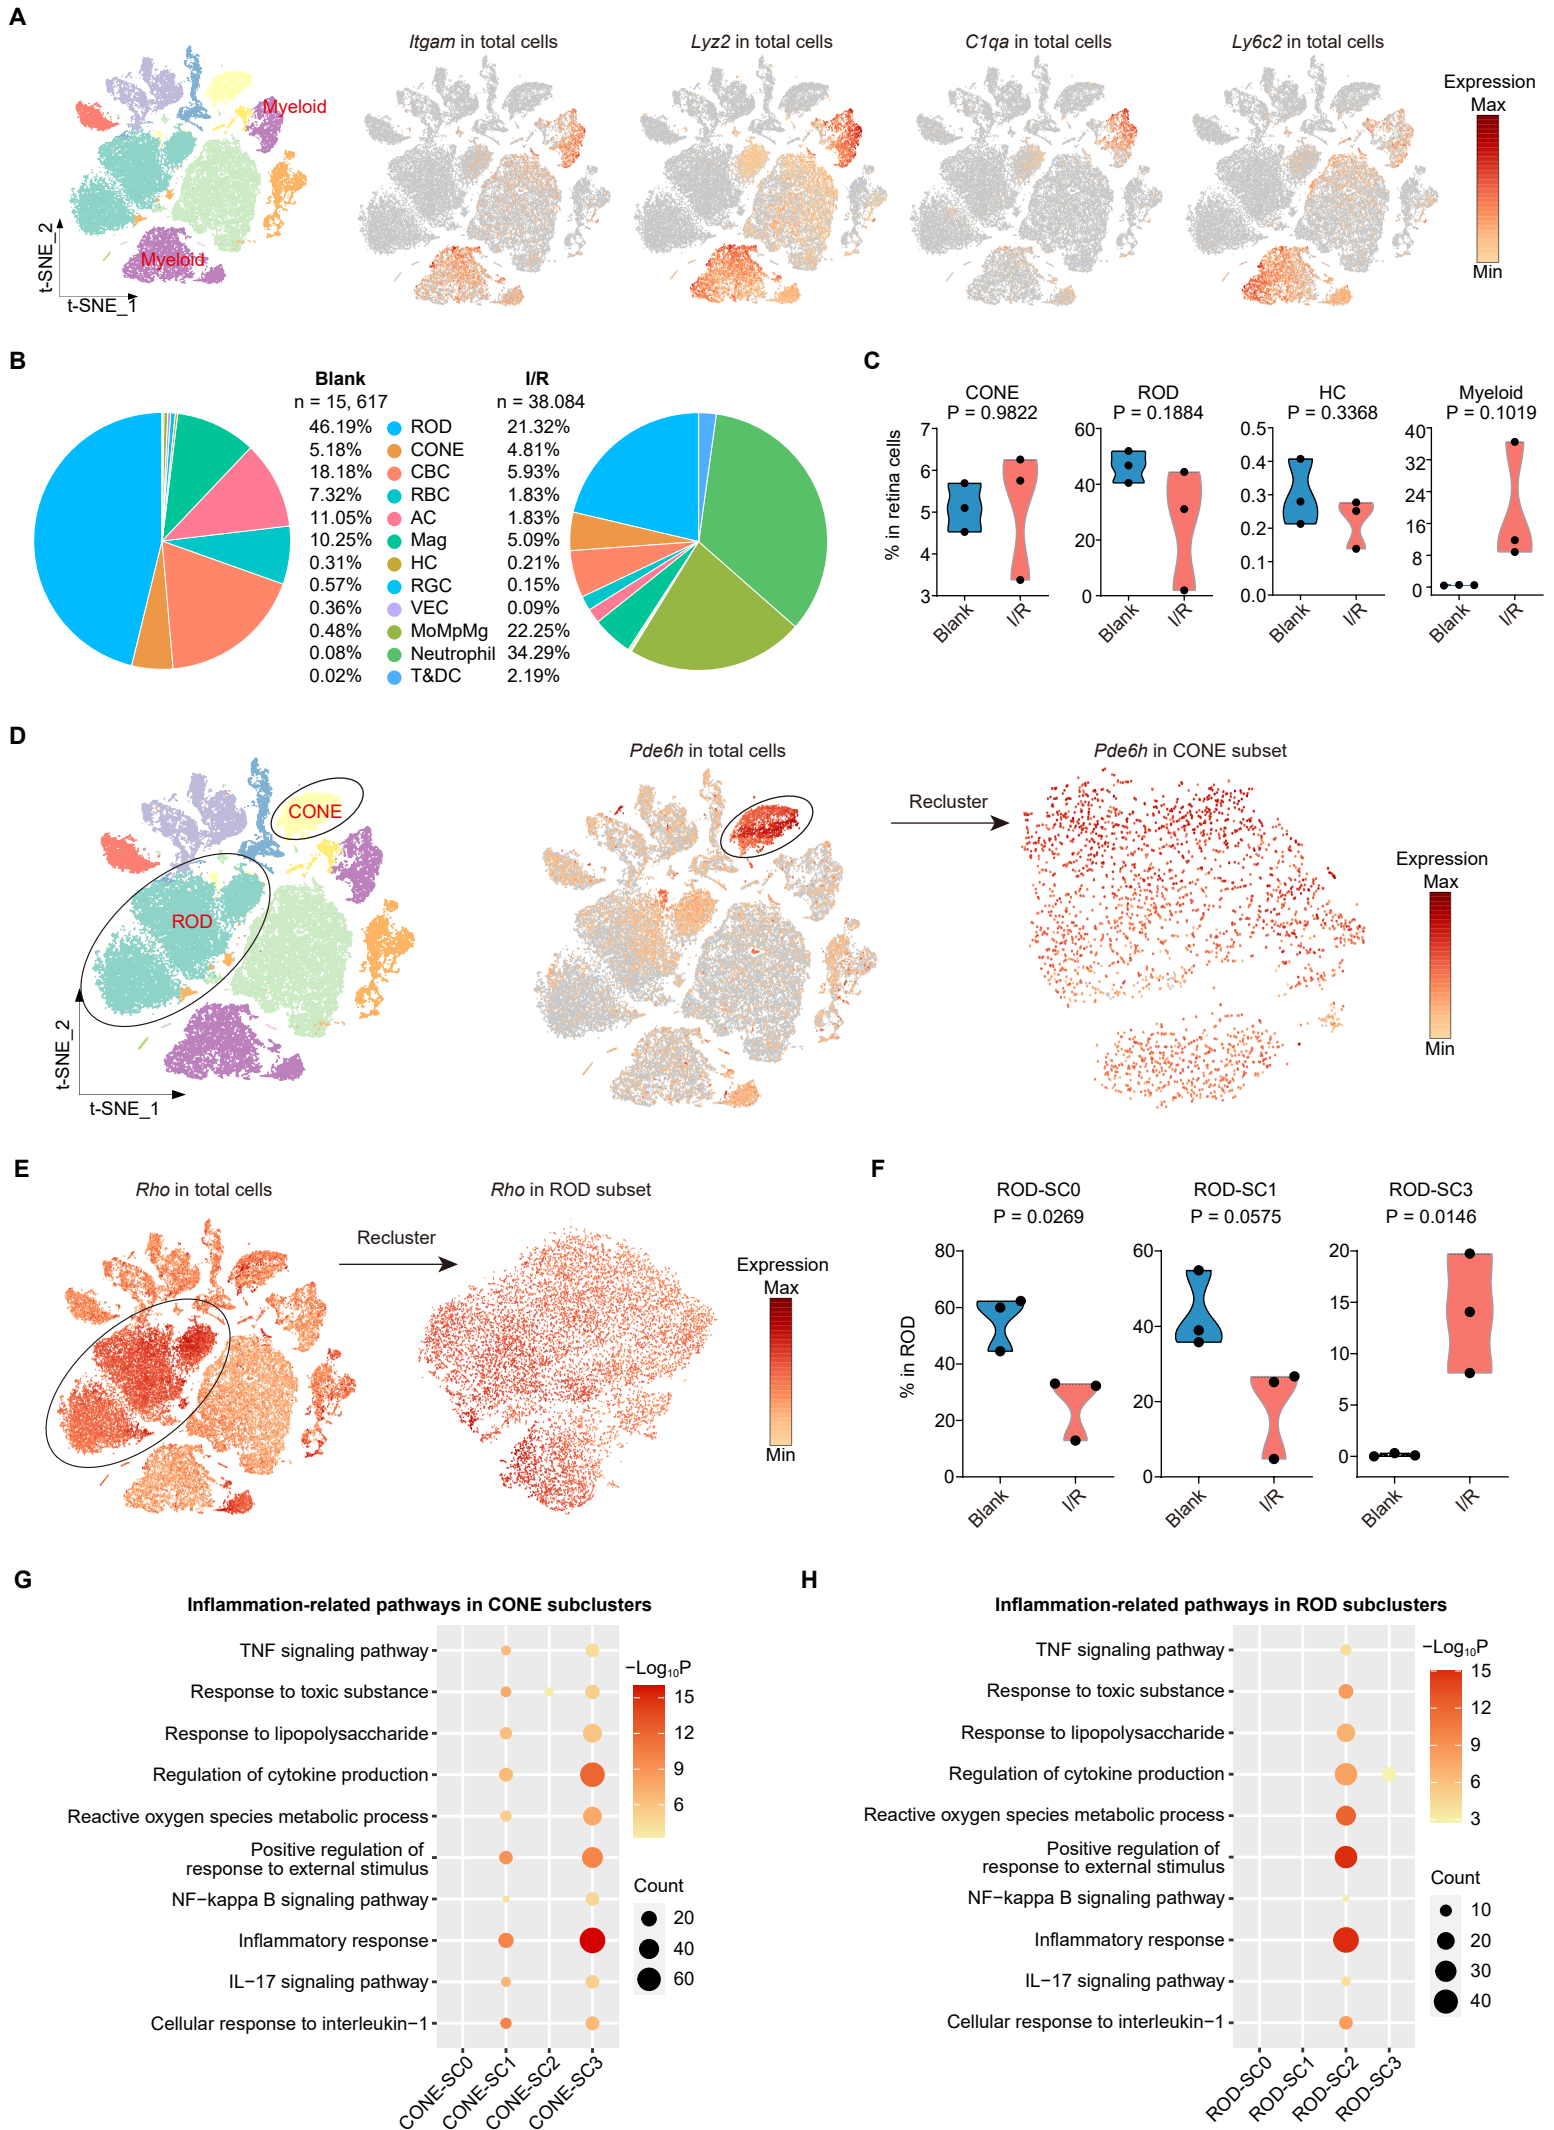

**Figure S2**

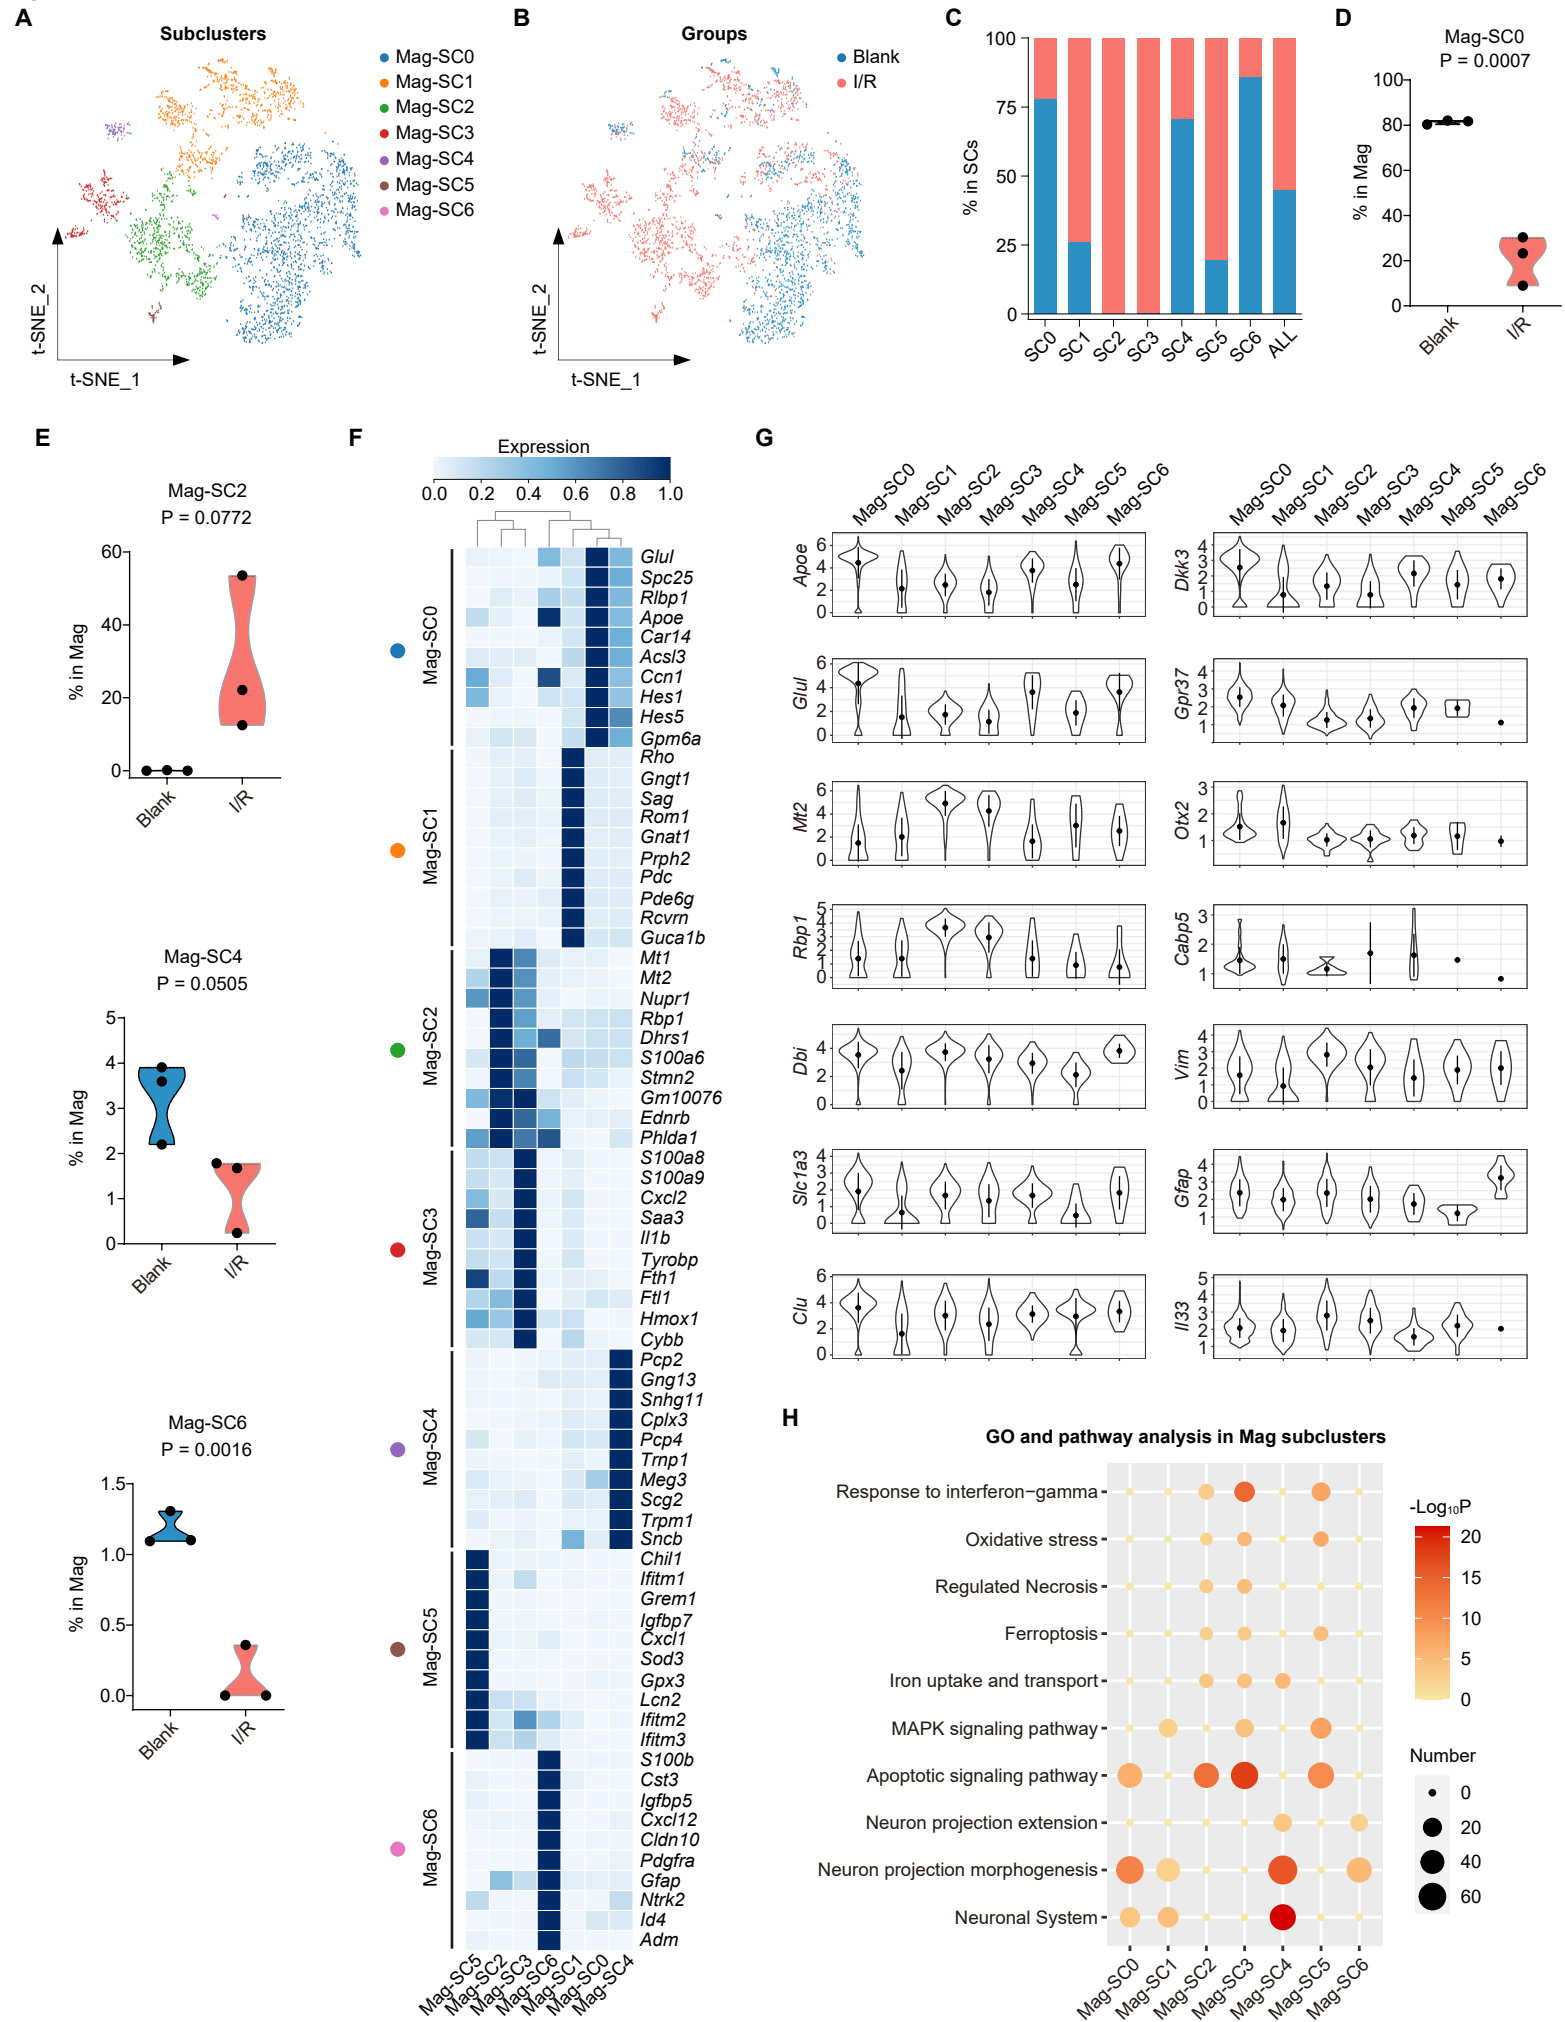

**Figure S3**

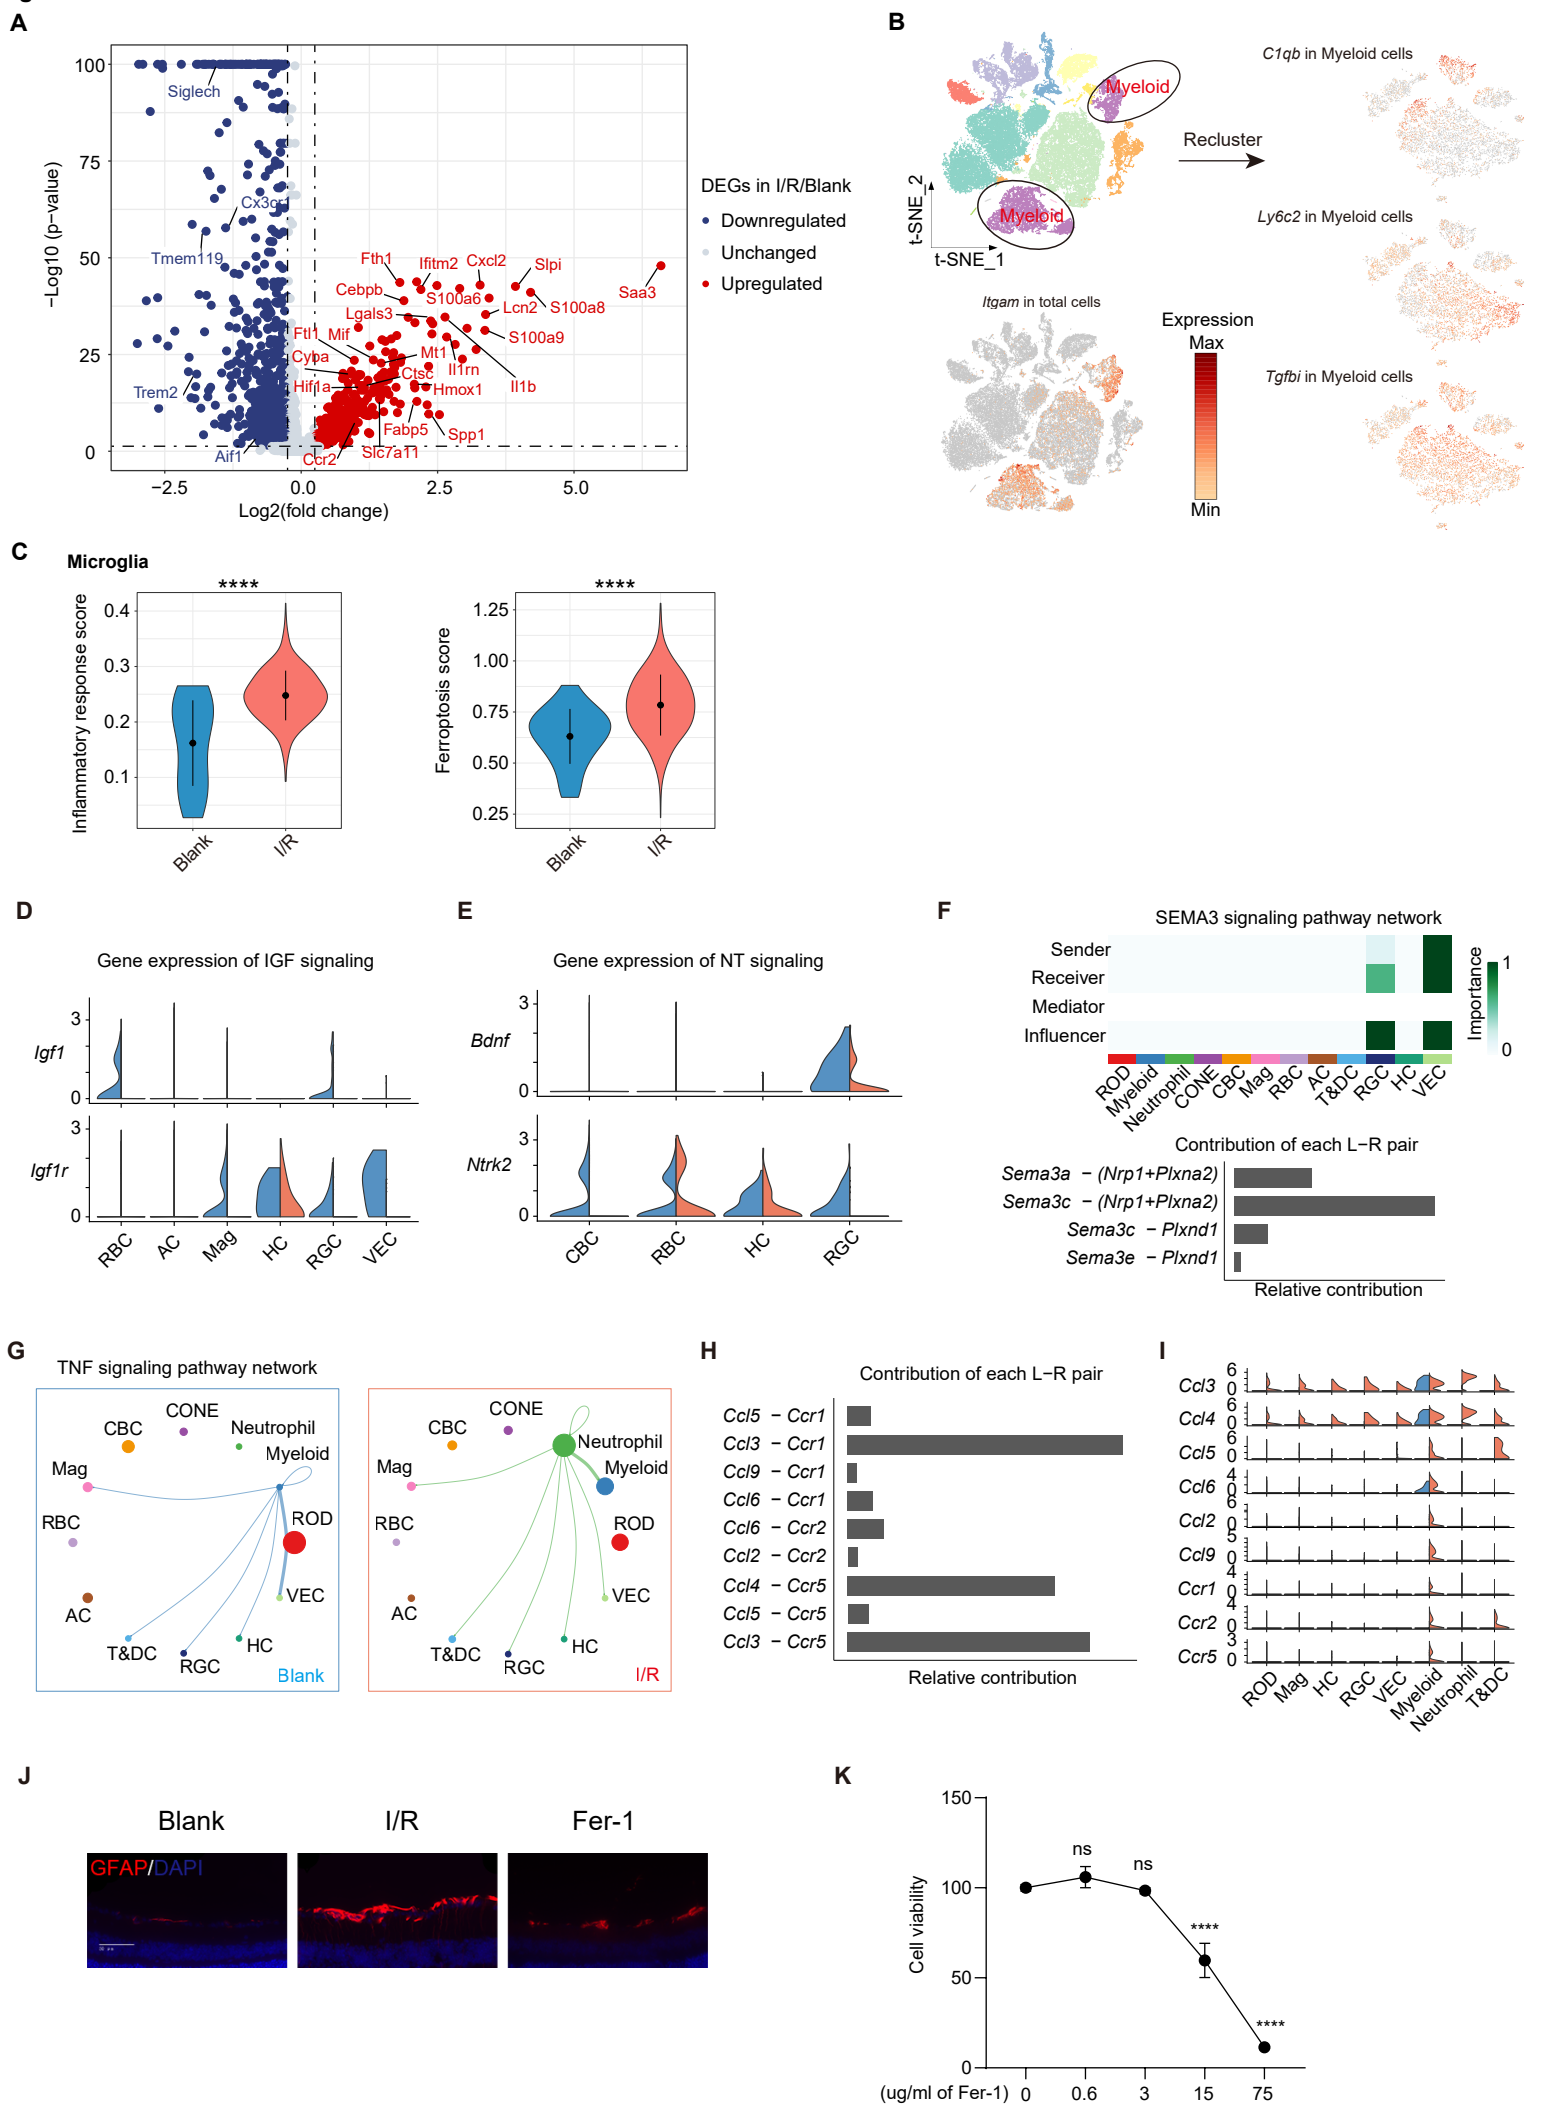

Figure S4

A

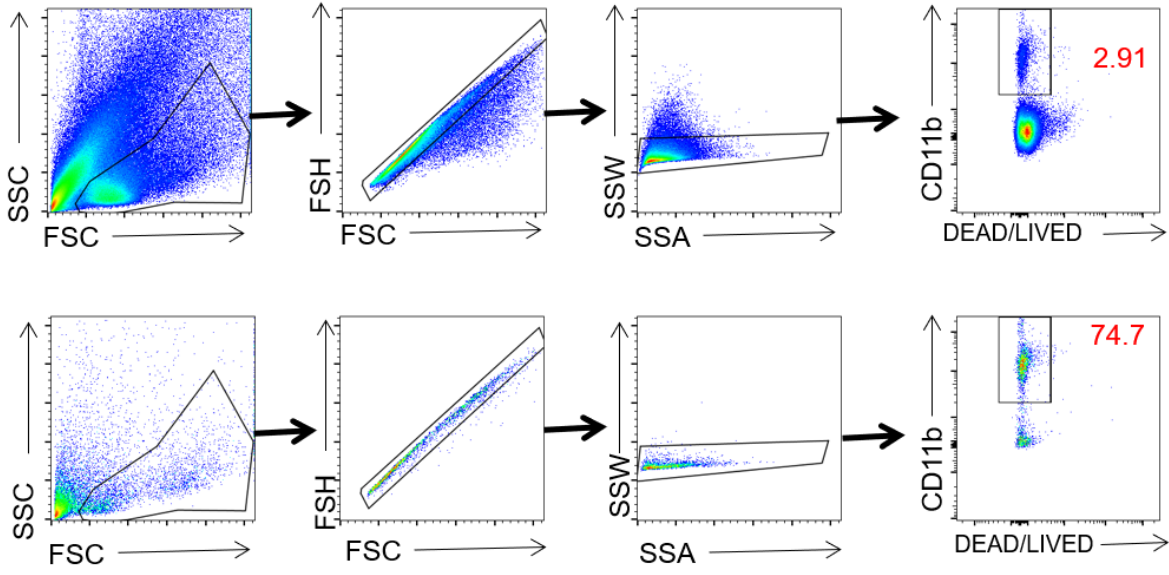

B

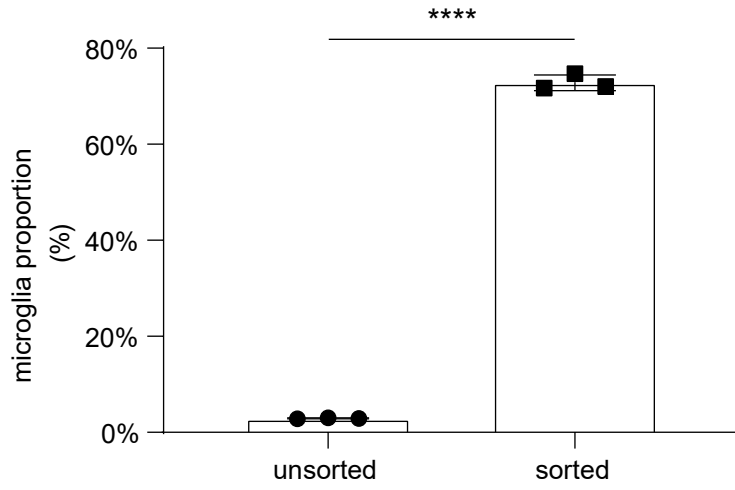

Supplement: MOESM1 [file 23642872]
